# Supplementary material for: Classification of polyethylene cling films by attenuated total reflectance-Fourier transform infrared spectroscopy and chemometrics
Source: Royal Society of Chemistry journal article supplement (doi:10.1039/c6ay02960d), 2016-12-02
Supplement: c6ay02960d1.pdf [file c6ay02960d1.pdf]

## Classification of polyethylene cling films by attenuated total reflectance-Fourier transform infrared spectroscopy and chemometrics

Christopher J Telford<sup>a†</sup>, Benjamin A. Burrows<sup>a</sup>, Georgina Sauzier<sup>a,b</sup>, Wilhelm van Bronswijk<sup>a</sup>,  
Max M. Houck<sup>c</sup>, Mark Maric<sup>d</sup> and Simon W Lewis<sup>\*a,b</sup>

### Electronic Supplementary Information

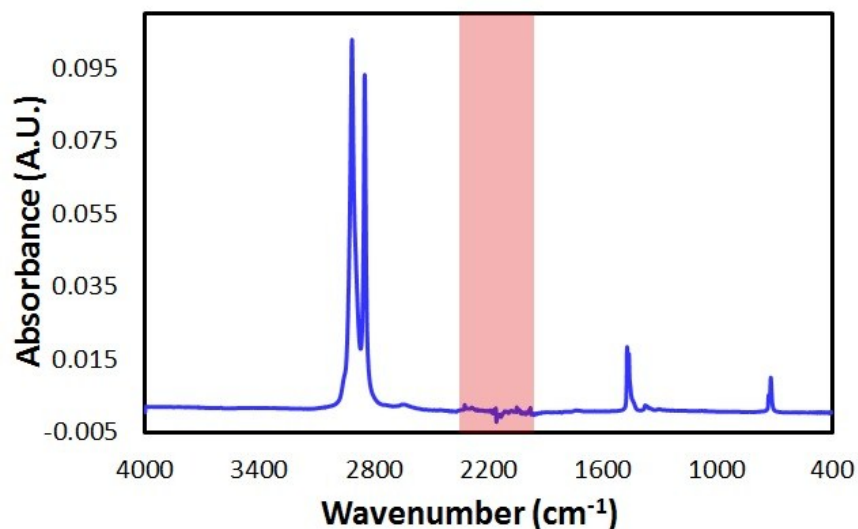

**Figure S1** Typical cling film spectrum (acquired from Coles Cling Wrap) over the full 4,000-400  $\text{cm}^{-1}$  spectral region. Red shaded region indicates absorbance interference attributed to the diamond sampling crystal

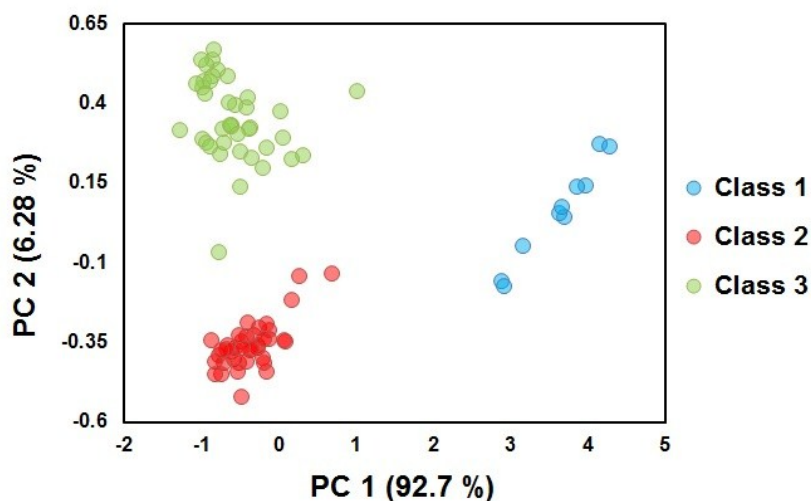

**Figure S2** Two-dimensional PCA scores plot showing distribution of cling film samples into three distinct classes based on their infrared spectral properties using the entire spectral range between 4,000 – 400  $\text{cm}^{-1}$

<sup>a</sup> Department of Chemistry, Curtin University, GPO Box U1987, Perth, Western Australia 6845.

<sup>b</sup> Nanochemistry Research Institute, Curtin University, GPO Box U1987, Perth, Western Australia 6845.

<sup>c</sup> University of South Florida St. Petersburg, 140 7th Ave. South, Davis Hall, St. Petersburg, FL 33701

<sup>d</sup> National Centre for Forensic Science, University of Central Florida, Orlando, FL, USA

\*Corresponding author E-mail: s.lewis@curtin.edu.au

† Deceased.
